# Supplementary material for: Genetic diversity of indigenous guinea fowl (Numida meleagris) using microsatellite markers in northern Togo
Source: PeerJ. 2022 Jan 20;10:e12637. doi: 10.7717/peerj.12637 (PMC8784013; doi:10.7717/peerj.12637)
Supplement: Supplemental Information 2 [file peerj-10-12637-s002.xlsx]

## Sheet: Agoecological zones
Population (agroecological zones)	n° samples	GF43	GUJ001	GUJ0059	GUJ0066	GF13	GF005	GUJ0084	GF30	GF75	GF168	GF12	GUJ013	GF37	GUJ0086	MCW0222	GF69	GF74	MCW0069
Dry Savannah	BSSan 1.12	00	00	213213	00	00	00	00	00	00	00	00	00	00	00	00	00	210210	00
Dry Savannah	BSSan 2.11	115115	222222	221221	185185	114114	167167	167167	200202	215215	226230	102104	146150	226230	207211	226230	190198	210210	190198
Dry Savannah	BSSan 2.12	113113	222222	00	00	114114	167167	167167	200202	213217	214226	094104	134146	214226	211211	214226	182198	212212	198198
Dry Savannah	BSGan 1.3	115115	222222	00	185185	114114	165165	165167	200202	217217	214214	104104	134134	206214	205205	214214	182182	210214	182182
Dry Savannah	BSGan 1.5	113113	222222	213215	189189	134134	167167	167167	202202	213215	214214	102104	134134	206214	207211	00	182198	210210	182198
Dry Savannah	BSNag 1.3	115115	222224	211213	187241	114114	165167	165167	200200	213213	230230	094104	150150	222230	211211	222230	182182	208212	00
Dry Savannah	BSNag 2.3	115115	222222	213213	173185	124134	167167	167167	202202	213213	230230	104110	150150	230230	205207	230230	182182	212212	182182
Dry Savannah	BSNag 3.3	115115	222226	213213	185185	124134	165167	165167	202202	213217	214214	098104	134134	214214	207207	214214	192198	208212	00
Dry Savannah	PSDap 1.3	113113	222224	211213	217227	114134	167167	167167	200200	213213	214230	106110	134150	214230	207211	214230	198198	212212	198198
Dry Savannah	PSDap 3.1	113115	222222	211211	179185	114114	165165	165165	200200	213217	214226	100104	134146	214226	205207	214226	198198	212214	198198
Dry Savannah	PSDap 3.5	115115	222222	211213	185185	114124	165167	165167	200200	217217	226230	100104	146150	226230	205205	226230	182198	210212	198198
Dry Savannah	PSCin 3.4	113115	222222	221221	185185	116134	165167	165167	200200	213213	230230	102104	150150	226230	207207	230230	182198	212212	182198
Dry Savannah	PSCin 3.8	115117	222222	221221	187237	114134	165167	165167	200202	213213	214230	102104	134150	214230	207207	214230	198198	212212	198198
Dry Savannah	PSYam 3.1	115115	222222	219219	187187	114114	167167	167167	200202	213213	226230	104106	146150	226230	207207	226230	182182	210210	182182
Dry Savannah	PSYam 3.3	115115	224226	223223	185185	114114	167167	167167	200202	213213	226230	094104	146150	226230	207211	226230	182198	208212	182198
Dry Savannah	PSNad 1.3	115117	222222	211211	185185	124134	165167	165167	200202	207213	214230	098104	134150	214230	207207	214230	182182	210210	182182
Dry Savannah	PSNad 1.5	115115	222222	211213	185185	00	165167	165167	202202	213217	214226	098100	134146	214226	205207	00	198198	208210	198198
Dry Savannah	PSNad 2.4	115117	222222	213213	185185	114114	167167	167167	200200	213213	214214	104110	134134	208214	207211	214214	198198	208208	198198
Dry Savannah	PSKan 2.6	115115	222222	211215	187233	134134	167167	167167	200200	217217	214226	104110	134146	214226	207207	214226	182198	212212	00
Dry Savannah	PSKan 2.7	115117	222222	213213	187245	114134	167167	167167	202202	213213	214214	102104	134134	208214	211211	214214	182198	212212	182198
Dry Savannah	PSKan 2.8	113115	222222	211219	189237	114114	167167	167167	202202	217217	214230	104104	134150	214230	205205	214230	182198	210212	182198
Dry Savannah	PRSTim 2.5	115115	222222	213215	185227	122122	167167	167167	200200	213213	226230	094104	146150	226230	207207	226230	182198	212212	182198
Dry Savannah	PRSNdg 1.1	115115	222222	211215	185185	122134	167167	167167	202202	217217	214226	102104	134146	214226	207207	214226	182198	210210	182198
Dry Savannah	PRSNdg 3.3	115115	222224	213219	189189	134136	165167	167167	202202	217217	214230	104110	134150	214230	205211	214230	182190	208210	182190
Dry Savannah	PRSYam 2.7	115115	222226	213219	185185	114114	165165	165165	202202	213217	214230	094094	134150	214230	211211	214230	182190	208212	182190
Dry Savannah	PRSOga 2.3	115115	222222	213213	187245	114134	165167	165167	200200	213217	226226	094094	146146	222226	207207	226226	182198	210212	00
Dry Savannah	PRSNal 3.6	115115	222222	215219	185195	114122	165167	165167	200200	207213	230230	104104	150150	230230	205211	230230	182182	212212	182182
Dry Savannah	PRSNad 3.6	115117	222222	213215	237237	122134	165167	165167	202202	213217	214230	104108	134150	214230	205207	214230	182182	210212	182182
Dry Savannah	PRSFar 1.9	115115	222222	213231	173189	114124	165167	165167	202202	213213	214222	104104	134142	214222	207207	214222	182192	210212	182192
Dry Savannah	PRSFar 2.5	115115	222222	213213	185185	114114	165165	165165	202202	213213	214214	102104	134134	214214	205205	214214	182182	210210	182182
Dry Savannah	PRSFar 3.6	113117	222226	00	185189	114114	167167	167167	202202	217217	222226	104104	142146	222226	205211	222226	182188	212212	182188
Dry Savannah	PRSNba 1.5	115115	222222	211219	187193	116116	165167	165165	192202	213217	00	104104	00	00	207207	00	182182	208210	00
Dry Savannah	PRSNba 3.3	113117	222222	219223	189237	114134	165167	165167	192200	213217	214214	102102	134134	214214	207211	214214	182198	208212	182198
Dry Savannah	GPSCin 1.4	115115	222222	211219	179187	124124	167167	167167	200202	213213	214214	094094	134134	208214	207211	214214	198198	208210	198198
Dry Savannah	GPSCin 2.3	115115	222224	211213	187227	114114	167167	167167	200202	213213	214226	104104	134146	214226	205207	214226	190198	210212	190198
Dry Savannah	GPSTim 2.2	115117	222222	213223	173191	114134	167167	167167	200202	213217	230230	104104	150150	226230	205205	230230	182182	208214	182182
Dry Savannah	GPSTim 3.1	115115	222224	213213	185191	124124	165165	165165	200200	213217	226226	104104	146146	226226	207207	226226	182182	210212	182182
Dry Savannah	GPSNan 1.3	113115	222222	213219	173185	124124	167167	167167	200202	213213	214226	094100	134146	214226	205207	214226	182190	210212	182190
Dry Savannah	GPSNan 2.9	113115	222222	219219	185185	136136	165167	165167	200202	213215	214230	104104	134150	214230	205211	214230	190198	208210	190198
Dry Savannah	GPSNan 3.3	113117	222224	219219	169195	114136	165167	165167	200200	213213	226230	102104	146150	226230	207211	226230	190190	210210	188190
Dry Savannah	GPSNan 3.5	117117	222224	219219	169187	114136	165167	165167	200202	215217	214226	104104	134146	214226	205211	214226	182198	210212	182198
Dry Savannah	GPSGan 2.7	115115	222222	213213	185233	114134	165167	165167	202202	213217	222226	100104	142146	222226	205205	222226	182182	212212	182182
Dry Savannah	GPSGan 3.2	111115	222222	213215	173195	114124	165167	165167	202202	213217	214222	104110	134142	214222	209209	214222	182182	208212	182182
Dry Savannah	GPSNba 2.4	113115	222222	211213	237237	114134	167167	167167	200202	213217	214226	104104	134146	214226	207207	214226	182182	210212	182182
Dry Savannah	GPSNba 3.2	117117	222222	213219	227237	114114	167167	167167	202202	213213	214230	104110	134150	214230	205205	214230	198198	212212	198198
Dry Savannah	GPSNba 3.8	115115	222222	213215	237237	114134	167167	167167	200202	217217	214226	102104	134146	214226	207211	214226	182182	212212	182182
Dry Savannah	ASSan 3.13	115115	222222	215215	231231	124134	165167	165167	202202	213213	214230	102102	134150	214230	205211	214230	190190	210212	190190
Dry Savannah	ASCin 2.6	115115	222222	215215	185235	114114	167167	167167	202202	213213	214230	094104	134150	214230	207207	214230	190198	208212	190198
Dry Savannah	ASGan 2.3	115115	222222	213213	185227	114114	167167	167167	200202	207213	214214	102104	134134	208214	205207	214214	182182	212212	182182
Dry Savannah	ASGan 2.5	115115	222222	213213	187227	124124	167167	167167	202202	213217	222230	104110	142150	222230	207207	222230	182198	212212	00
Dry Savannah	LSTim 3.5	113113	00	211223	183233	114124	165167	165167	200202	213215	214226	104104	134146	214226	205207	214226	198198	208212	198198
Dry Savannah	LSNan 2.2	113115	222222	211231	239239	114134	167167	167167	200202	213213	226230	094104	146150	226230	205205	226230	182192	210214	182192
Dry Savannah	LSYam 1.1	115117	224224	211211	239239	134136	165167	165167	202202	213213	214230	104110	134150	214230	205207	214230	182198	212212	182198
Dry Savannah	LSOga 2.7	113117	222224	211213	187231	134134	165167	165167	202202	213217	226230	108110	146150	226230	207207	226230	190198	212212	190198
Dry Savannah	LSNad 3.5	117117	222222	213213	185185	134134	165165	165165	200202	207217	226230	104104	146150	226230	205207	226230	182182	00	182190
Dry Savannah	LSBar 1.1	00	222222	211211	189189	124124	167167	167167	200202	217217	230230	104110	150150	226230	205209	230230	182190	212212	182190
Dry Savannah	LSNag 1.1	115117	224224	211215	187241	114136	165167	165167	200202	213213	230230	104104	150150	230230	207211	230230	182198	208212	182198
Dry Savannah	LSDap 1.6	113113	00	00	169169	134134	165167	165167	202202	213213	214230	094104	134150	214230	205207	214230	190198	210210	190198
Dry Savannah	NPSNal 2.5	115117	222222	213213	185237	114134	167167	167167	200200	213213	214230	108110	134150	214230	205205	214230	182198	208208	182198
Dry Savannah	BSSan 1.12	115115	222222	213213	189237	124134	167167	167167	200200	213213	226226	104110	146146	222226	207207	226226	182190	210210	182190
Atakora	BANam 1.6	113115	222224	213213	185219	136136	165167	165167	200202	213217	226230	102104	146150	226230	205211	226230	198198	208210	198198
Atakora	BANam 1.9	113115	222222	215215	185219	124132	165165	165165	200200	217217	222230	094104	146150	222230	205205	222230	182182	212212	182182
Atakora	BANam 3.11	115115	222222	213213	00	114114	165167	165167	192202	213217	222230	108110	142150	222230	211211	222230	182186	212214	182186
Atakora	BASou 1.1	115117	222222	211219	185237	114124	165167	165167	202202	213213	214230	094104	134150	214230	205207	214230	198198	212212	198198
Atakora	BASou 1.4	111115	222224	211219	189237	122134	165165	165165	202202	213215	214230	104110	134150	214230	205207	214230	182182	212212	182198
Atakora	BASou 2.2	113115	222222	213215	187237	114134	165167	165167	200200	217217	226226	102102	146146	226226	207211	226226	182198	212212	182198
Atakora	BASou 3.2	113115	222222	213215	169237	00	167167	167167	202202	213217	214230	094104	134150	214230	205211	214230	182182	212212	182182
Atakora	BAPag 1.1	115115	222222	211213	193193	114124	167167	167167	200202	217217	214214	102106	134134	214214	205207	214214	198198	210210	198198
Atakora	BAPag 1.3	115115	222222	211213	169193	114124	165167	165167	200202	217217	214226	102104	134146	214226	205205	214226	182198	212212	182198
Atakora	BAPag 3.1	115115	222222	213213	185185	00	167167	167167	202202	213213	214226	104104	134146	214226	207211	214226	182182	212212	182182
Atakora	BAPag 3.2	115117	222222	213213	185185	124134	167167	165167	202202	213213	214230	100104	134150	214230	205211	214230	198198	212212	198198
Atakora	PAKba 1.10	111115	222222	213213	161233	124134	165167	165167	200200	217217	214214	102110	134134	214214	211211	214214	186186	212212	186186
Atakora	PAAfo 1.7	111115	222226	211223	185189	00	165167	165167	200200	207217	226226	102106	146146	220226	205205	220226	182192	212212	182192
Atakora	PABag 2.6	115117	222224	219223	187187	114114	167167	167167	200202	213217	226230	104104	146150	226230	205207	226230	190190	208212	190190
Atakora	PABag 3.2	117117	222222	213213	187237	114124	165165	165165	202202	213217	230230	102102	150150	226230	207211	230230	182198	212212	182198
Atakora	PAAct 3.4	115115	222222	213213	233233	114136	165165	165167	202202	213217	230230	110110	150150	230230	207211	230230	188192	210212	00
Atakora	PRANam 1.3	115115	00	00	00	00	167167	165167	202202	00	222230	00	142150	00	00	222230	00	210210	00
Atakora	PRANam 2.2	117117	222222	213213	185189	114114	165167	165167	202202	215217	214230	104104	134150	214230	207211	214230	186186	212212	186186
Atakora	PRANam 2.4	115117	222222	215215	185233	00	165165	165165	200202	213213	226230	094100	146150	226230	207207	226230	182182	210212	182182
Atakora	PRANaw 2.6	115115	226226	223223	187233	00	165167	165167	202202	217217	214214	100104	134134	208214	207211	214214	198198	208210	198198
Atakora	PRAAfo 1.3	113115	222222	211219	187187	00	165167	165167	200200	207213	214230	102104	134150	214230	207207	214230	182182	212212	182182
Atakora	PRAAfo 2.4	115115	222222	211215	185245	114136	165165	165165	202202	213217	226230	102104	146150	226230	205205		182198	210210	182198
Atakora	PRASou 2.6	111111	222222	221223	185185	00	00	00	00	00	00	00	00	00	00	00	182182	212212	182182
Atakora	PRAAct 2.1	115115	222222	213223	169185	114114	167167	167167	202202	217217	230230	094100	150150	230230	207213	230230	182186	210212	182186
Atakora	GPANam 3.4	113115	222222	211213	185185	124132	165165	165165	200202	213213	230230	094110	150150	226230	207207	230230	192198	210210	192198
Atakora	GPANaw 2.3	115117	222222	213213	189251	134134	165165	165167	200200	217217	214230	102104	134150	214230	205211	214230	182200	210212	182200
Atakora	GPAKba 2.2	115115	222222	213215	189189	134136	165167	165167	200202	213217	214214	102102	134134	214214	207207	214214	182182	210212	182182
Atakora	GPADao 3.8	115117	222222	213213	187255	124124	165167	165167	202202	213213	230230	094110	150150	230230	205205	230230	182182	212212	182182
Atakora	GPAPag 2.6	115117	222224	213215	185185	00	165167	165167	202202	213213	214214	094104	134134	214214	205205	214214	198198	210210	198198
Atakora	GPAAct 3.3	115115	222222	211211	235249	00	167167	167167	202202	213217	222230	106106	142150	222230	205205	222230	192192	212212	192192
Atakora	AASol 1.1	115117	222224	213213	169243	114134	165167	165167	202202	217217	226226	104110	146146	226226	207211	226226	198198	212212	198198
Atakora	NPADao 2.2	111115	222224	211211	185185	114114	165167	165167	202202	213217	214226	104106	134146	214226	207207	214226	182188	212212	182188
Atakora	NPASol 2.2	115115	222222	213213	187187	114134	165167	165167	202202	213217	214226	104106	134146	214226	205207	214226	182192	212212	182192
Atakora	NPAPag 2.4	115117	222222	211211	185185	114114	167167	167167	202202	213217	214230	104106	134150	214230	207211	214230	182182	212212	182182
Atakora	NPAAct 2.9	115115	222222	213213	185185	114114	167167	167167	200200	207213	230230	102104	150150	230230	205207	230230	182182	212212	182182
